# Supplementary material for: Preference for Competitive Employment in People with Mental Disorders: A Systematic Review and Meta-analysis of Proportions
Source: Springer Nature journal article supplement (doi:10.1007/s10926-024-10192-0), 2024-04-25
Supplement: MOESM1 [file 10926_2024_10192_MOESM1_ESM.pdf]

# Supplementary Material

## **Index**

|                                                   |    |
|---------------------------------------------------|----|
| Full search strategy.....                         | 2  |
| JBI Quality Criteria for prevalence studies ..... | 3  |
| JBI Quality Ratings .....                         | 5  |
| Subgroup Analyses.....                            | 6  |
| Sensitivity Analyses .....                        | 12 |
| Excluded papers .....                             | 13 |

## **Correspondence to:**

Dr Christine Adamus, Centre for Psychiatric Rehabilitation, Universitäre Psychiatrische Dienste Bern (UPD), 3098 Köniz, Switzerland

[christine.adamus@unibe.ch](mailto:christine.adamus@unibe.ch)

## Full search strategy

**Table S1** Ovid (Medline, PsycInfo)

|            |                                                                                                                                                                                                                                                                                                  |
|------------|--------------------------------------------------------------------------------------------------------------------------------------------------------------------------------------------------------------------------------------------------------------------------------------------------|
| Population | ((mental or mentally or psychiatr*).ti,ab. AND                                                                                                                                                                                                                                                   |
| Outcome    | (prefer* or choice* or attitude* or choose* or desire* or intend* or intent* or wish* or favo?r* or volition*).ti,ab. AND                                                                                                                                                                        |
| Condition  | (job or employ* or vocation* or (labo?r adj market*) or career* or occup* or work*).ti.)                                                                                                                                                                                                         |
|            | Population AND Outcome AND Condition                                                                                                                                                                                                                                                             |
| Exclusion  | NOT (burnout* or overwork* or undergraduate* or student* or paramedic* or gerontolog* or p?ediatr* or oncolog* or cancer* or physician* or surg* or implant* or (intensive adj care) or ICU or fMRI or stroke or child* or newborn* or retire* or nurs* or healthcare or workforce or COVID).ti. |
| Filter     | Humans, Publication date 1990 until recent, Abstract available, Peer reviewed journal, Remove duplicates                                                                                                                                                                                         |

**Table S2** EBSCOhost (Cinahl)

|            |                                                                                                                                                                                                                                                                                               |
|------------|-----------------------------------------------------------------------------------------------------------------------------------------------------------------------------------------------------------------------------------------------------------------------------------------------|
| Population | (TI ( mental or mentally or psychiatr* ) OR AB ( mental or mentally or psychiatry*)) AND                                                                                                                                                                                                      |
| Outcome    | ((TI (prefer* or choice* or attitude* or choose* or desire* or intend* or intent* or wish* or favo?r* or volition*) OR (AB (prefer* or choice* or attitude* or choose* or desire* or intend* or intent* or wish* or favo?r* or volition*)))) AND                                              |
| Condition  | (TI (job or employ* or vocation* or (lab* market) or career* or occup* or work*))                                                                                                                                                                                                             |
| Exclusion  | NOT (TI (burnout* or overwork* or undergraduate* or student* or paramedic* or gerontolog* or p?ediatr* or oncolog* or cancer* or physician* or surg* or implant* or (intensive care) or ICU or fMRI or stroke or child* or newborn* or retire* or nurs* or healthcare or workforce or COVID)) |
| Filter     | Humans, Publication date 1990 until recent, Abstract available, Peer reviewed journal, Exclude MEDLINE records                                                                                                                                                                                |

Adamus, Richter, Sutor, Zürcher, & Mötteli. Preference for competitive employment in people with mental disorders – A systematic review and meta-analysis of proportions.

## JBI Quality Criteria for prevalence studies

**Table S3** JBI quality criteria

| Variable Name                                  | Full question                                                     | YES (1 Point)                                                                                                                                                                                                                                                                                                                                                                                                                       | NO (0 Point)                                                                                         | Unclear (0 Points)                                                                                                                                                                              |
|------------------------------------------------|-------------------------------------------------------------------|-------------------------------------------------------------------------------------------------------------------------------------------------------------------------------------------------------------------------------------------------------------------------------------------------------------------------------------------------------------------------------------------------------------------------------------|------------------------------------------------------------------------------------------------------|-------------------------------------------------------------------------------------------------------------------------------------------------------------------------------------------------|
| <b>Q1: Sampling Frame</b>                      | Was the sample frame appropriate to assess the target population? | Appropriate sample frame for our purpose within a clear defined setting:<br>Working-aged adults with MD                                                                                                                                                                                                                                                                                                                             | No clear or inappropriate sampling frame for our purpose                                             | No information available                                                                                                                                                                        |
| <b>Q2: Recruitment</b>                         | Were study participants recruited in an appropriate way?          | Random or complete sampling<br>AND<br>Clear report / description of how sampling was performed                                                                                                                                                                                                                                                                                                                                      | No appropriate sampling method (e.g., snowball sampling / convenience sampling, incomplete sampling) | No clear report / description / declaration of how sampling was performed                                                                                                                       |
| <b>Q3: Sample Size</b>                         | Was the sample size adequate?                                     | Sample size calculation was done regarding adult MD Sample<br>OR<br>Large adult MD sample size of at least 300                                                                                                                                                                                                                                                                                                                      | No sample size calculation<br>AND<br>Sample size of adult MD (sub)sample below 300                   | Sample size not declared / unclear (e.g., studies that calculated prevalence rates just for a subset of individuals, and it is not clear which subset was used for this calculation)            |
| <b>Q4: Description of Subjects and Setting</b> | Were the study subjects and setting described in detail?          | A minimal description must include the following:<br>Subjects:<br><ul style="list-style-type: none"> <li>- sex ratio,</li> <li>- age (any information on age),</li> <li>- employment status,</li> <li>- MD (minimal description of / if)</li> </ul> Setting:<br><ul style="list-style-type: none"> <li>- Country/ region,</li> <li>- Setting: inpatient/ outpatient/ community / normal population with MD / prison etc.</li> </ul> | At least one item of minimal description is missing                                                  | When the target sample (adults with MD) builds only a subsample of the study sample, and minimal description was only provided regarding the whole study sample, but not regarding our purposes |

Adamus, Richter, Sutor, Zürcher, & Mötteli. Preference for competitive employment in people with mental disorders – A systematic review and meta-analysis of proportions.

|                                 |                                                                                              |                                                                                                                                                                                                                      |                                                                                                                                                                                                   |                                                                                    |
|---------------------------------|----------------------------------------------------------------------------------------------|----------------------------------------------------------------------------------------------------------------------------------------------------------------------------------------------------------------------|---------------------------------------------------------------------------------------------------------------------------------------------------------------------------------------------------|------------------------------------------------------------------------------------|
| <b>Q6: Valid Assessment</b>     | Were valid methods used for the identification of the condition?                             | Self-reported preferences (e.g., single-item questions) or validated self-reported scales to assess preferences<br>AND<br>Appropriately defined labour market (e.g., general labour market / competitive employment) | e.g., Observer reported / rated preferences                                                                                                                                                       | Assessment methods unclear (e.g., vague definition of preference or labour market) |
| <b>Q8: Statistical Analysis</b> | Was there an appropriate statistical analysis?                                               | The numerator and denominator of reported prevalence are clearly reported (or transparent)                                                                                                                           | No clear reporting of numerator / denominator (typically: only percentages for prevalence rates provided)                                                                                         | <i>not applicable</i>                                                              |
| <b>Q9: Response Rate</b>        | Was the response rate adequate, and if not, was the low response rate managed appropriately? | Response rate of at least 70% (included divided by eligible and contacted)<br>OR<br>Discussion of non-response rate (reasons, consequences)<br>OR<br>Comparison of responders and non-responders                     | Response rate < 70%<br>OR<br>No response rate reported (denominator unclear / unable to calculate response rate)<br>AND<br>No discussion regarding the influence of non-response rate on outcomes | <i>not applicable</i>                                                              |

Adamus, Richter, Sutor, Zürcher, & Mötteli. Preference for competitive employment in people with mental disorders – A systematic review and meta-analysis of proportions.

## JBI Quality Ratings

**Table S4** JBI quality ratings of the included studies

| Study                       | Q1 Sampling Frame | Q2 Recruitment | Q3 Sample Size | Q4 Description | Q6 Assessment | Q8 Analysis | Q9 Response Rate | JBI Score      | Quality Rating |
|-----------------------------|-------------------|----------------|----------------|----------------|---------------|-------------|------------------|----------------|----------------|
| Ali et al. (2011)           | YES               | YES            | NO             | YES            | YES           | NO          | YES              | 5/7            | Medium         |
| Bonsaksen et al. (2016)     | NO                | YES            | NO             | YES            | YES           | YES         | YES              | 5/7            | Medium         |
| Briest (2020)               | YES               | YES            | YES            | YES            | YES           | NO          | YES              | 6/7            | High           |
| Camardese & Youngman (1996) | YES               | NO             | NO             | NO             | YES           | YES         | NO               | 3/7            | Low            |
| Casper & Carloni (2007)     | YES               | YES            | NO             | YES            | YES           | YES         | YES              | 6/7            | High           |
| Drebing et al. (2004)       | YES               | NO             | NO             | YES            | YES           | NO          | YES              | 4/7            | Medium         |
| Eikermann & Reker (1993)    | YES               | YES            | YES            | YES            | NO            | YES         | YES              | 6/7            | High           |
| Filia et al. (2021)         | YES               | unclear        | NO             | YES            | unclear       | YES         | NO               | 3/7            | Low            |
| Frounfelker et al. (2011)   | YES               | YES            | YES            | YES            | YES           | YES         | YES              | 7/7            | High           |
| Graffam & Naccarella (1997) | YES               | NO             | NO             | YES            | YES           | NO          | NO               | 3/7            | Low            |
| Gühne et al. (2021)         | YES               | NO             | YES            | YES            | YES           | YES         | YES              | 6/7            | High           |
| Hatfield et al. (1992)      | YES               | NO             | NO             | YES            | unclear       | YES         | YES              | 4/7            | Medium         |
| Henry et al. (2006)         | YES               | unclear        | YES            | unclear        | YES           | YES         | YES              | 5/7            | Medium         |
| Hölzle et al. (2018)        | YES               | NO             | NO             | YES            | YES           | YES         | YES              | 5/7            | Medium         |
| Iyer et al. (2011)          | YES               | unclear        | NO             | NO             | YES           | YES         | YES              | 4/7            | Medium         |
| Khare et al. (2020)         | YES               | NO             | NO             | YES            | YES           | YES         | NO               | 4/7            | Medium         |
| Khare et al. (2021)         | YES               | YES            | NO             | YES            | YES           | YES         | YES              | 6/7            | High           |
| Knaeps et al. (2015)        | YES               | unclear        | YES            | YES            | YES           | YES         | YES              | 6/7            | High           |
| Laudet et al. (2002)        | YES               | NO             | NO             | YES            | YES           | NO          | YES              | 4/7            | Medium         |
| Macias et al. (2001)        | YES               | NO             | NO             | YES            | YES           | YES         | NO               | 4/7            | Medium         |
| McQuilken et al. (2003)     | YES               | NO             | YES            | YES            | YES           | YES         | NO               | 5/7            | Medium         |
| Mueser et al. (2001)        | YES               | unclear        | NO             | YES            | unclear       | YES         | NO               | 3/7            | Low            |
| Poremski et al. (2015)      | YES               | YES            | NO             | YES            | unclear       | NO          | NO               | 3/7            | Low            |
| Ramsay et al. (2011)        | YES               | NO             | NO             | YES            | YES           | YES         | NO               | 4/7            | Medium         |
| Rennhack et al.(2021)       | YES               | NO             | NO             | YES            | YES           | YES         | NO               | 4/7            | Medium         |
| Secker et al. (2001)        | YES               | YES            | NO             | NO             | YES           | YES         | YES              | 5/7            | Medium         |
| Secker, & Gelling (2006)    | YES               | unclear        | NO             | YES            | YES           | YES         | YES              | 5/7            | Medium         |
| Serowik et al. (2014)       | YES               | NO             | NO             | YES            | YES           | YES         | NO               | 4/7            | Medium         |
| Westcott et al. (2015)      | YES               | NO             | NO             | YES            | YES           | YES         | NO               | 4/7            | Medium         |
| Zaniboni et al. (2011)      | YES               | NO             | NO             | YES            | YES           | YES         | NO               | 4/7            | Medium         |
| <b>Total</b>                | <b>29</b>         | <b>9</b>       | <b>7</b>       | <b>26</b>      | <b>25</b>     | <b>24</b>   | <b>17</b>        | <b>137/210</b> |                |

## Subgroup Analyses

Fig. S1 Subgroup analysis of quality ratings

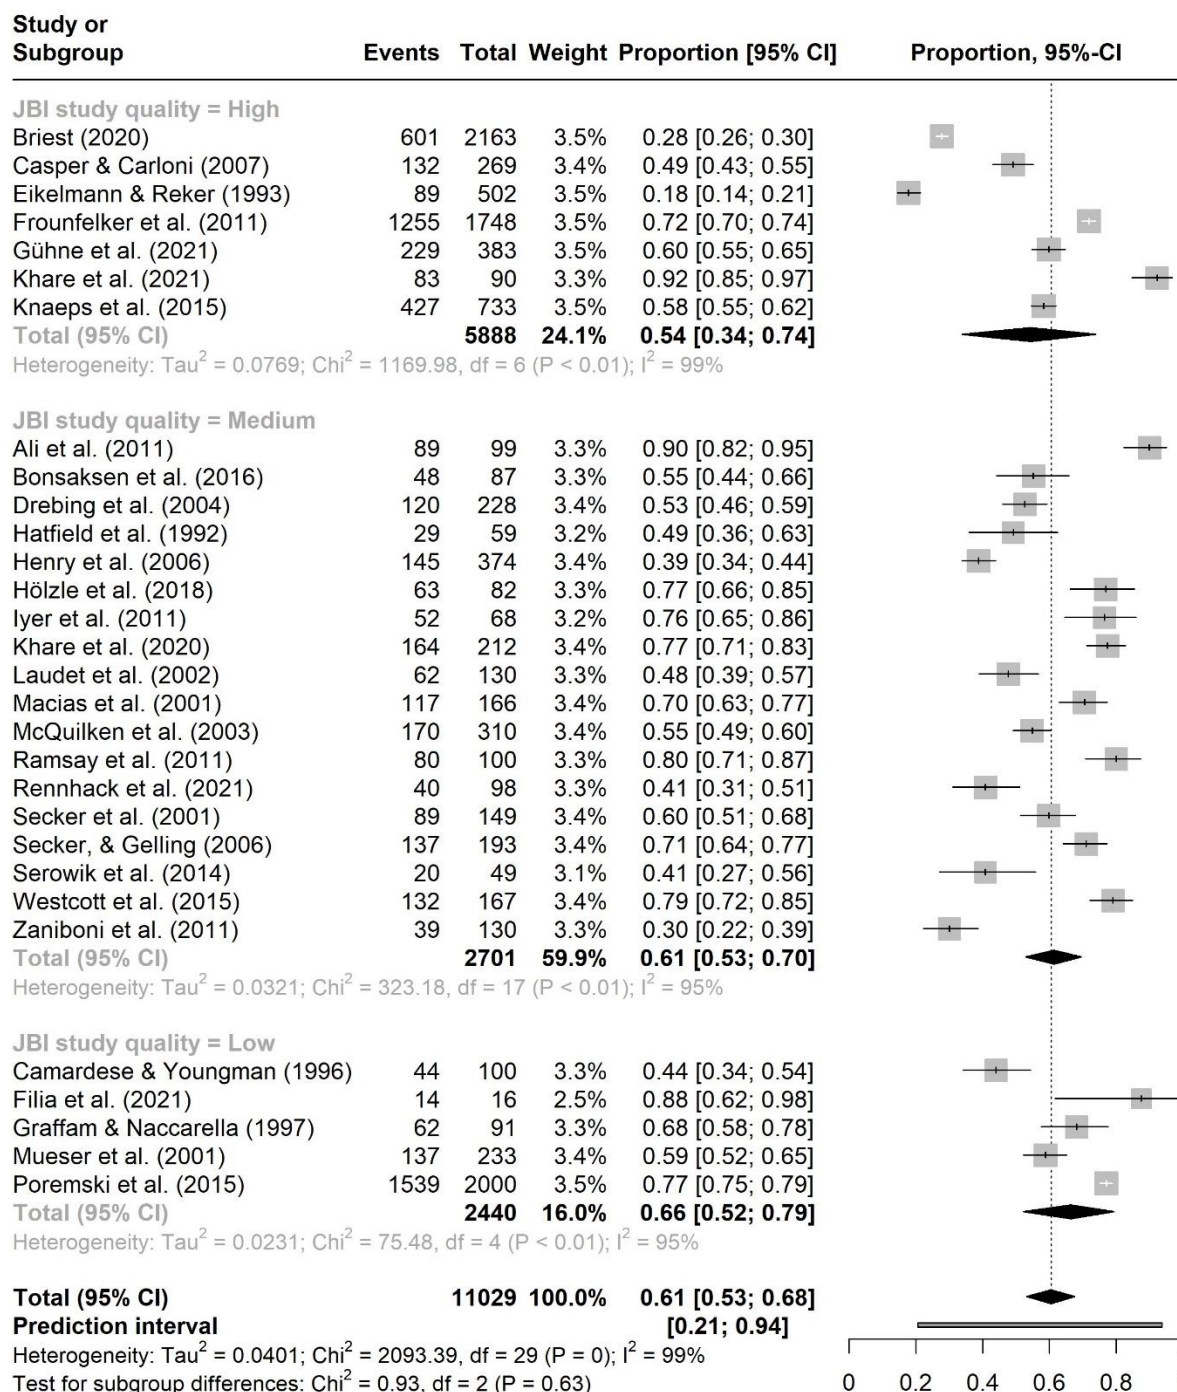

**Fig. S2** Subgroup analysis of support settings

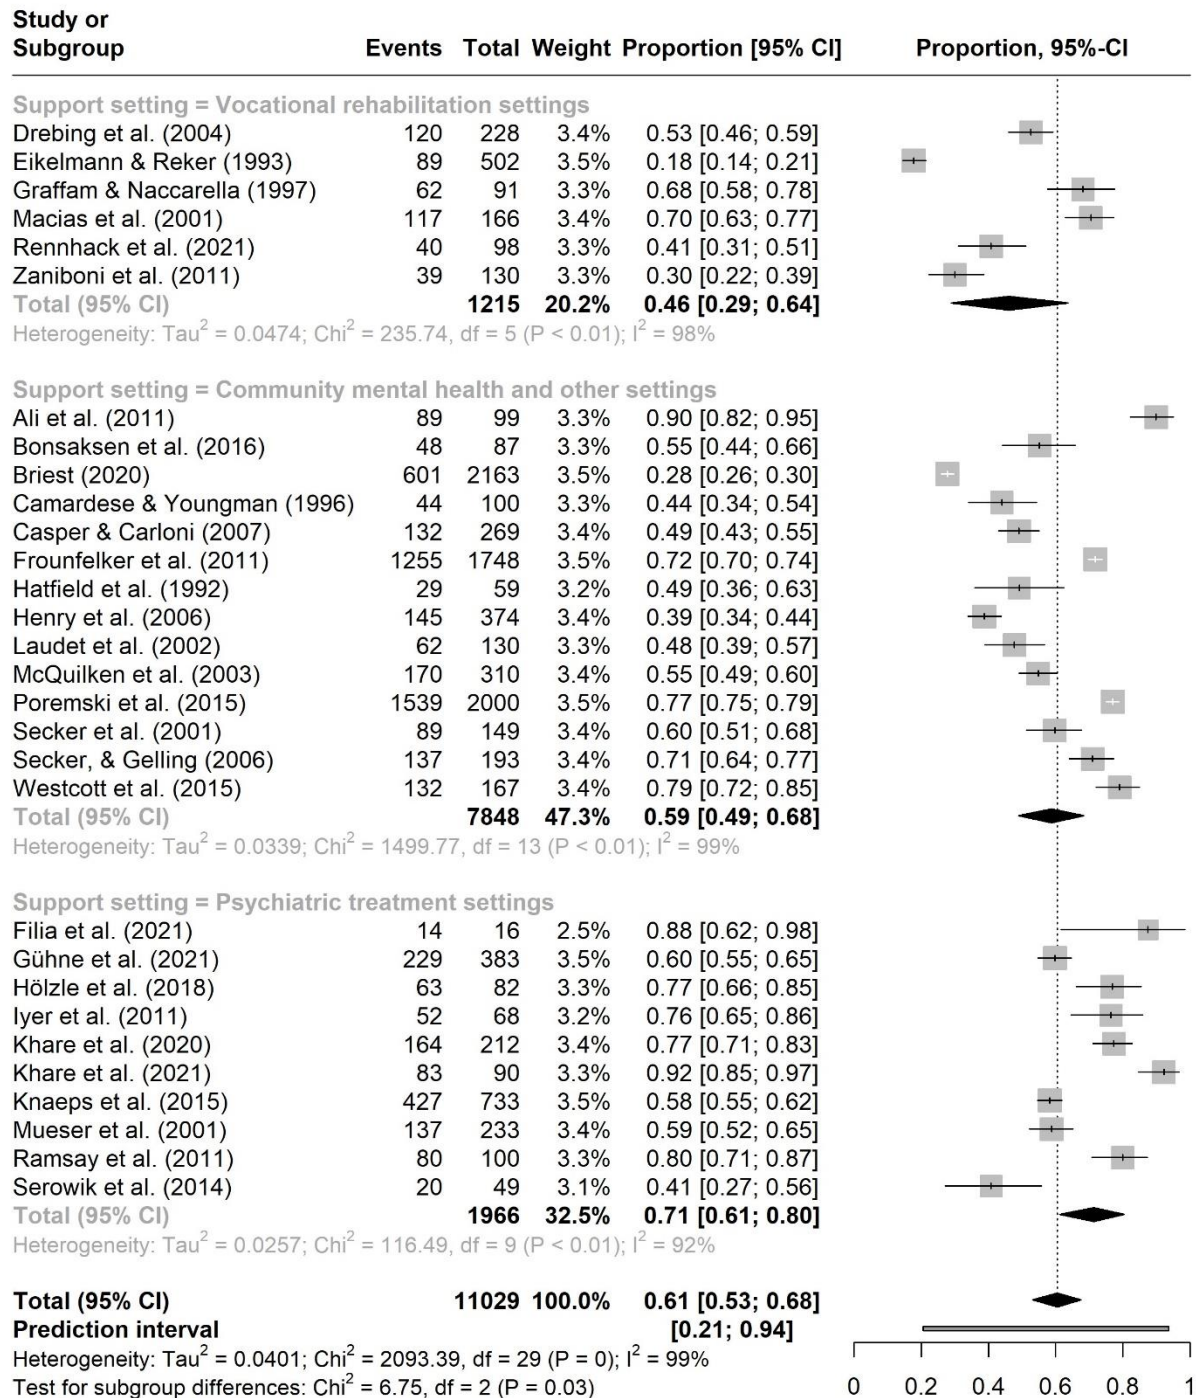



**Fig. S3** Subgroup analyses of schizophrenic disorders

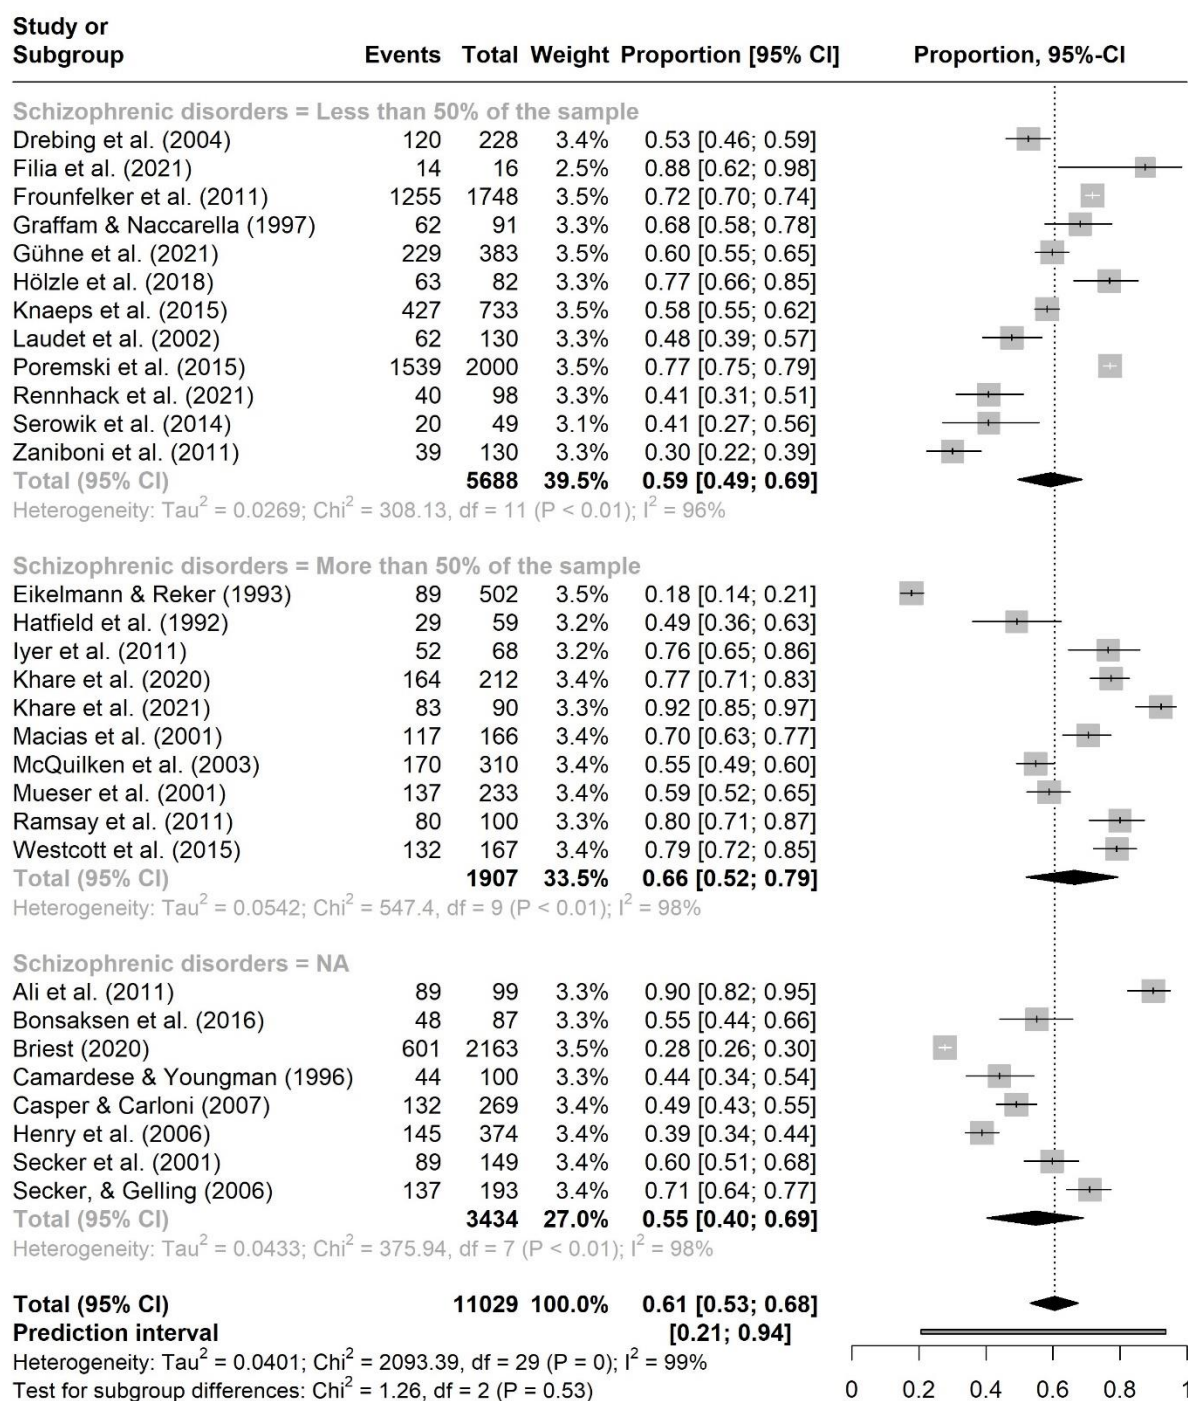



**Fig. S4** Subgroup analyses of assessment methods

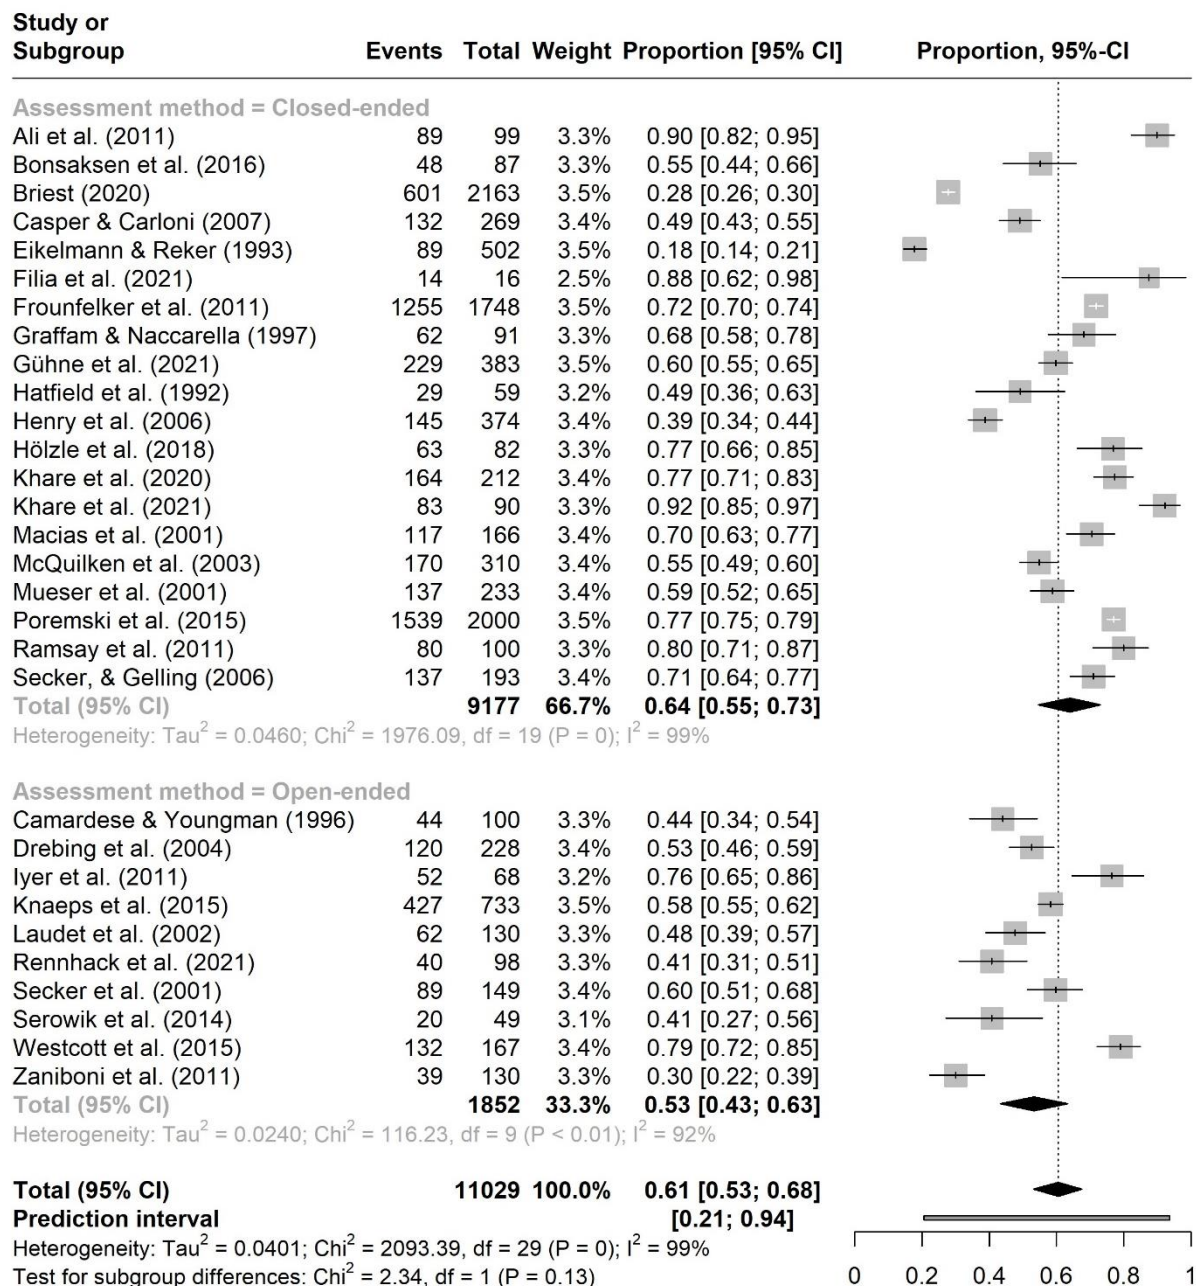

**Fig. S5** Subgroup analyses of publication year

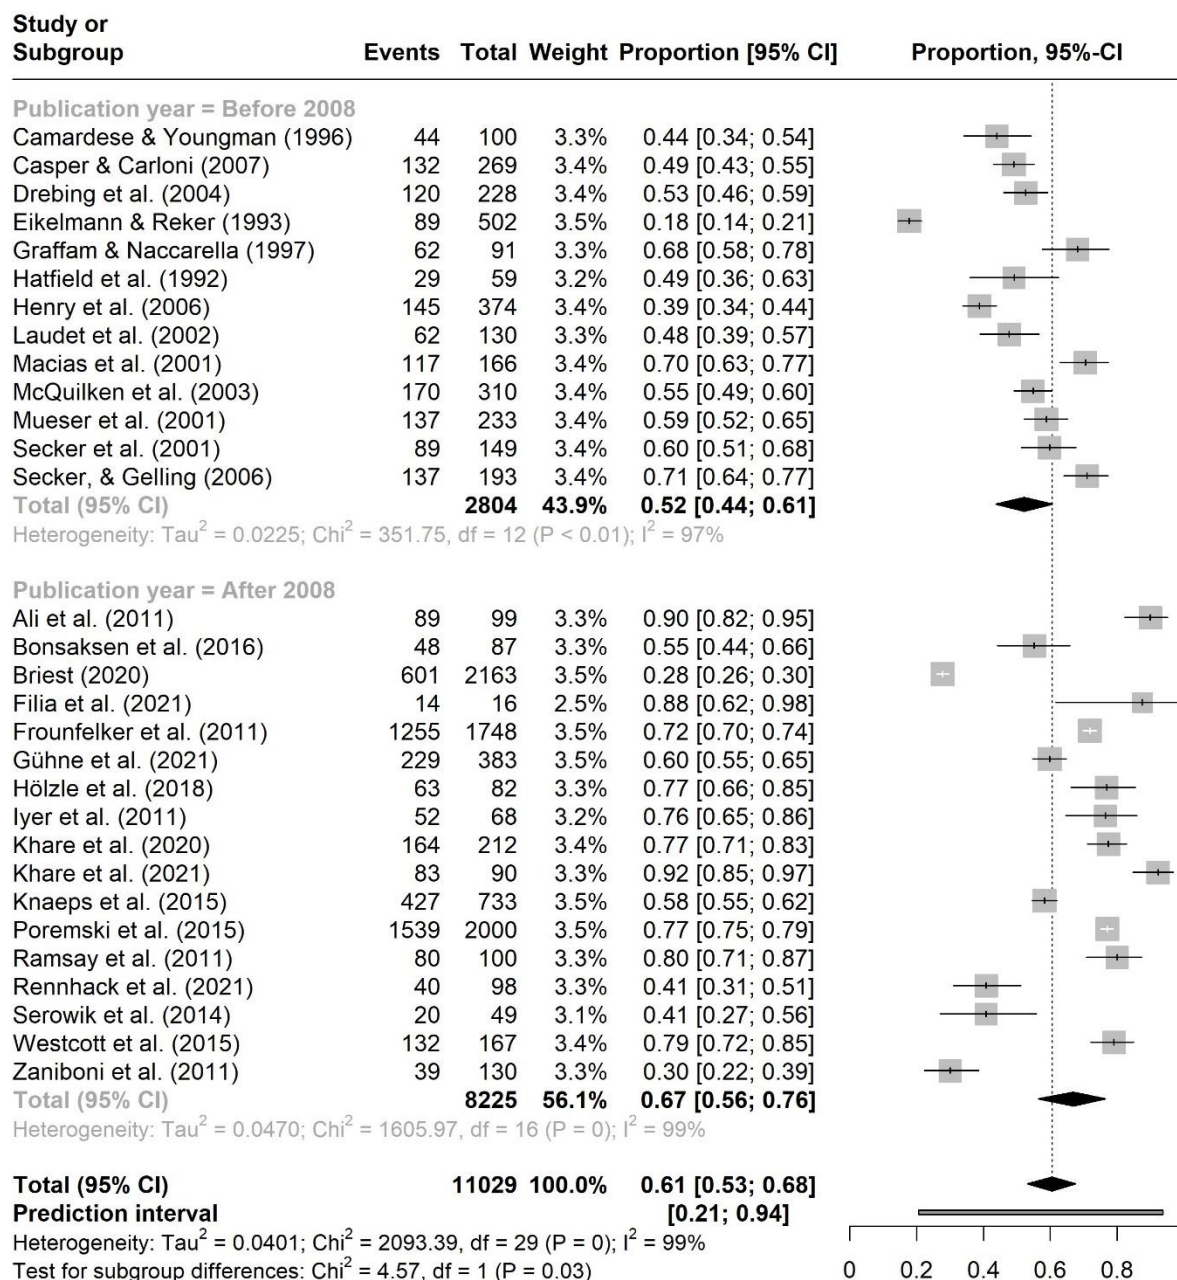

**Fig. S6** Subgroup analyses of world regions

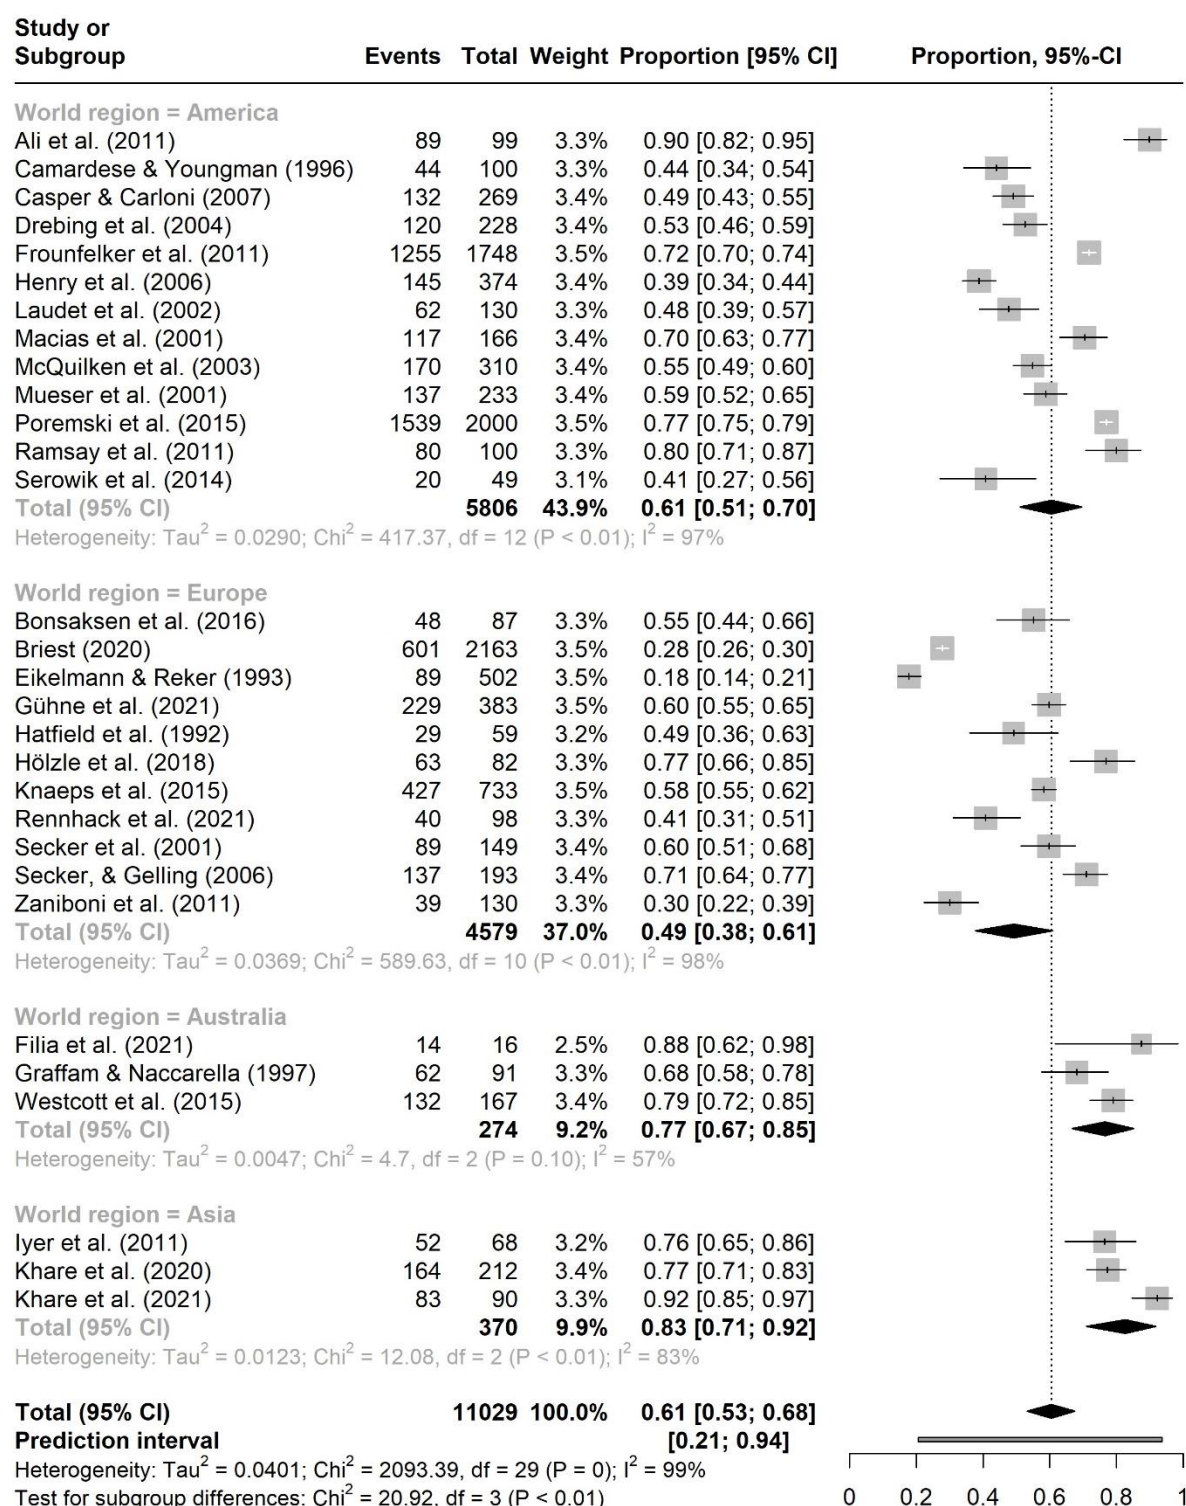



## Sensitivity Analyses

**Fig. S7** Sensitivity analysis of the pooled proportion of people with mental disorders who prefer competitive employment after exclusion of low quality studies (JBI score of 3 or lower)

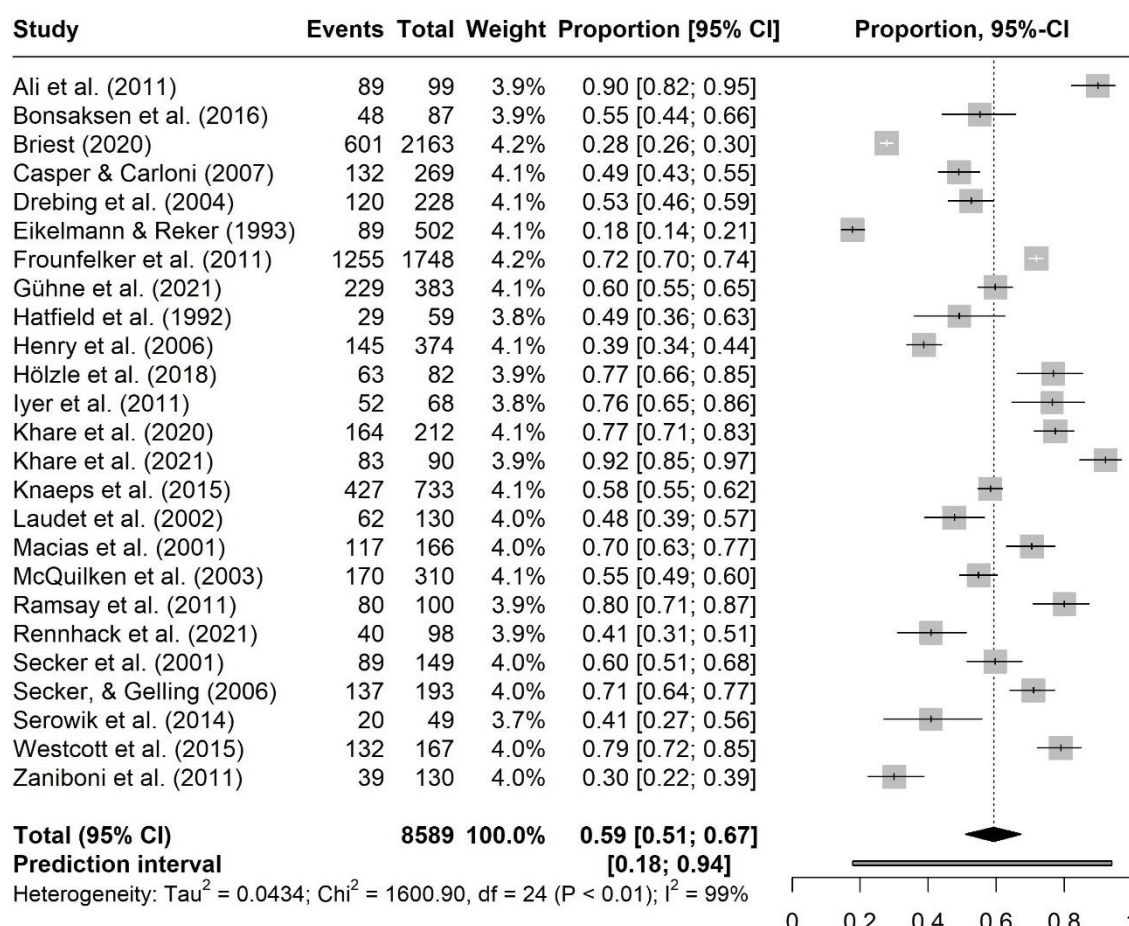

**Fig. S8** Sensitivity analysis of the pooled proportion of people with mental disorders who prefer competitive employment after exclusion of studies with inadequate recruitment methods (JBI Q2)

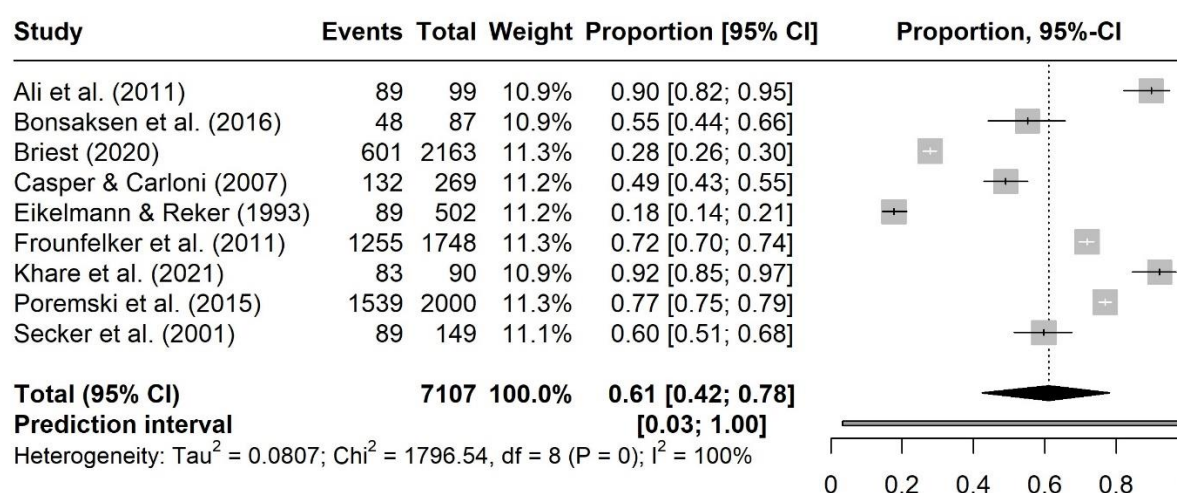

## Excluded papers

**Table S5** Citations of the excluded studies, their sources, and the reasons for exclusion

| <b>Citation</b>                                                                                                                                                                                                                                                                                                                  | <b>Source</b>   | <b>Reason for Exclusion</b>                                        |
|----------------------------------------------------------------------------------------------------------------------------------------------------------------------------------------------------------------------------------------------------------------------------------------------------------------------------------|-----------------|--------------------------------------------------------------------|
| Kleinova R. Work aspirations of youth with reduced work ability in the conditions of unemployment. <i>Psychologia a Patopsychologia Dietata</i> 1997; 32(2): 203-10.                                                                                                                                                             | database search | A. Article not reached                                             |
| Han SS, Han JH, Yun EK. [Predictors of employment intention for mentally disabled persons]. <i>Taehan Kanho Hakhoe Chi</i> 2008; 38(4): 541-9.                                                                                                                                                                                   | database search | B. Not written in Latin letters                                    |
| Asmundsdottir EE. The Worker Role Interview: A powerful tool in Icelandic work rehabilitation. <i>Work: Journal of Prevention, Assessment &amp; Rehabilitation</i> 2004; 22(1): 21-6.                                                                                                                                            | database search | C. Qualitative study                                               |
| Delman J, Adams LB. Barriers to and facilitators of vocational development for Black young adults with serious mental illnesses. <i>Psychiatric Rehabilitation Journal</i> . 2022;45(1):1-10.                                                                                                                                    | database search | C. Qualitative study                                               |
| Engdahl P, Svedberg P, Bejerholm U. Acceptability of a digital return-to-work intervention for common mental disorders: A qualitative study on service user perspectives. <i>BMC Psychiatry</i> . 2021;21.                                                                                                                       | database search | C. Qualitative study                                               |
| Flinn S, Ventura D, Bonder B. Return to work experiences for veterans with severe mental illness living in rural group home facilities. <i>Work: Journal of Prevention, Assessment &amp; Rehabilitation</i> 2005; 24(1): 63-70.                                                                                                  | database search | C. Qualitative study                                               |
| Holmlund L, Hellman T, Engblom M, Kwak L, Sandman L, Törnkqvist L, et al. Coordination of return-to-work for employees on sick leave due to common mental disorders: facilitators and barriers. <i>Disabil Rehabil</i> . 2022;44(13):3113-21.                                                                                    | database search | C. Qualitative study                                               |
| Joosen MCW, Lugtenberg M, Arends I, van Gestel HJAWM, Schaapveld B, Terluin B, et al. Barriers and facilitators for return to work from the perspective of workers with common mental disorders with short, medium and long-term sickness absence: A longitudinal qualitative study. <i>J Occup Rehabil</i> . 2022;32(2):272-83. | database search | C. Qualitative study                                               |
| Nagle S, Cook JV, Polatajko HJ. I'm doing as much as I can: Occupational choices of persons with a severe and persistent mental illness. <i>Journal of Occupational Science</i> 2002; 9(2): 72-81.                                                                                                                               | database search | C. Qualitative study                                               |
| Anton S. Influence of work attitudes on working Ability among those affected by posttraumatic stress disorder. <i>Journal of Loss and Trauma</i> 2006; 11(4): 311-9.                                                                                                                                                             | database search | D. No prevalence of preference for competitive employment reported |
| Audhoe SS, Nieuwenhuijsen K, Hoving JL, Sluiter JK, Frings-Dresen MHW. Perspectives of unemployed workers with mental health problems: Barriers to and solutions for return to work. <i>Disability &amp; Rehabilitation</i> 2018; 40(1): 28-34.                                                                                  | database search | D. No prevalence of preference for competitive employment reported |
| Baker AE, Procter NG. Losses related to everyday occupations for adults affected by mental illness. <i>Scand J Occup Ther</i> 2014; 21(4): 287-94.                                                                                                                                                                               | database search | D. No prevalence of preference for competitive employment reported |
| Batastini AB, Leuty ME, Davis RM, Jones ACT. Individual and situational factors predicting employment status among revoked community-released offenders. <i>Psychological Services</i> . 2021;18(4):454-63.                                                                                                                      | database search | D. No prevalence of preference for competitive employment reported |

|                                                                                                                                                                                                                                                                            |                 |                                                                    |
|----------------------------------------------------------------------------------------------------------------------------------------------------------------------------------------------------------------------------------------------------------------------------|-----------------|--------------------------------------------------------------------|
| Baumann M, Meyers R, Le Bihan E, Houssemand C. Mental health (GHQ12; CES-D) and attitudes towards the value of work among inmates of a semi-open prison and the long-term unemployed in Luxembourg. <i>BMC Public Health</i> 2008; 8: 214.                                 | database search | D. No prevalence of preference for competitive employment reported |
| Becker D, Whitley R, Bailey EL, Drake RE. Long-term employment trajectories among participants with severe mental illness in supported employment. <i>Psychiatric Services</i> 2007; 58(7): 922-8.                                                                         | database search | D. No prevalence of preference for competitive employment reported |
| Becker DR, Bebout RR, Drake RE. Job preferences of people with severe mental illness: A replication. <i>Psychiatric Rehabilitation Journal</i> 1998; 22(1): 46-50.                                                                                                         | database search | D. No prevalence of preference for competitive employment reported |
| Becker DR, Drake RE, Farabaugh A, Bond GR. Job preferences of clients with severe psychiatric disorders participating in supported employment programs. <i>Psychiatric Services</i> 1996; 47(11): 1223-6.                                                                  | database search | D. No prevalence of preference for competitive employment reported |
| Bedell JR, Draving D, Parrish A, Gervery R, Guastadisegni P. A description and comparison of experiences of people with mental disorders in supported employment and paid prevocational training. <i>Psychiatric Rehabilitation Journal</i> 1998; 21(3): 279-83.           | database search | D. No prevalence of preference for competitive employment reported |
| Bond GR, Campbell K, Becker DR. A test of the occupational matching hypothesis for rehabilitation clients with severe mental illness. <i>Journal of Occupational Rehabilitation</i> 2013; 23(2): 261-9.                                                                    | database search | D. No prevalence of preference for competitive employment reported |
| Bond GR, Dietzen LL, McGrew JH, Miller LD. Accelerating entry into supported employment for persons with severe psychiatric disabilities. <i>Rehabilitation Psychology</i> 1995; 40(2): 75-94.                                                                             | database search | D. No prevalence of preference for competitive employment reported |
| Borger C, Marrow J, Drake RE, Taylor J. Characteristics of enrollees in the supported employment demonstration. <i>Psychiatr Serv.</i> 2021;72(12):1400-6.                                                                                                                 | database search | D. No prevalence of preference for competitive employment reported |
| Braitman A, Counts P, Davenport R, et al. Comparison of barriers to employment for unemployed and employed clients in a case management program: An exploratory study. <i>Psychiatric Rehabilitation Journal</i> 1995; 19(1): 3-8.                                         | database search | D. No prevalence of preference for competitive employment reported |
| Brantschen E, Kawohl W, Rössler W, Bärtsch B, Nordt C. Supported Employment – Improving competitive employment for people with mental illness: The role of motivation and social network. <i>Journal of Vocational Rehabilitation</i> 2014; 40(1): 41-7.                   | database search | D. No prevalence of preference for competitive employment reported |
| Brantschen E, Landolt K, Kawohl W, Rössler W, Bärtsch B, Nordt C. Two types of expectancies concerning competitive employment among people with mental illness in supported employment. <i>Journal of Vocational Rehabilitation</i> 2017; 46(2): 195-202.                  | database search | D. No prevalence of preference for competitive employment reported |
| Brouwer S, Reneman MF, Bultmann U, van der Klink JJ, Groothoff JW. A prospective study of return to work across health conditions: Perceived work attitude, self-efficacy and perceived social support. <i>Journal of Occupational Rehabilitation</i> 2010; 20(1): 104-12. | database search | D. No prevalence of preference for competitive employment reported |
| Chen C-M, Wang J-Y, Yeh Y-C, Yang S-Y. Factors affecting employability of patients with schizophrenia who had first participated in vocational training: A pilot study. <i>Psychiatric Quarterly.</i> 2023;94(2):165-78.                                                   | database search | D. No prevalence of preference for competitive employment reported |



Adamus, Richter, Sutor, Zürcher, & Mötteli. Preference for competitive employment in people with mental disorders – A systematic review and meta-analysis of proportions.

|                                                                                                                                                                                                                                                        |                 |                                                                    |
|--------------------------------------------------------------------------------------------------------------------------------------------------------------------------------------------------------------------------------------------------------|-----------------|--------------------------------------------------------------------|
| Claudi Jensen AG. Towards a parsimonious program theory of return to work intervention. <i>Work</i> 2013; 44(2): 155-64.                                                                                                                               | database search | D. No prevalence of preference for competitive employment reported |
| Creed PA, Hicks RE, Machin MA. Behavioural plasticity and mental health outcomes for long-term unemployed attending occupational training programmes. <i>Journal of Occupational &amp; Organizational Psychology</i> 1998; 71(2): 171-91.              | database search | D. No prevalence of preference for competitive employment reported |
| Davis LL, Resnick SG, Maieritsch KP, et al. Employment outcomes from VA vocational services involving transitional work for veterans with a diagnosis of posttraumatic stress disorder. <i>Psychiatric Rehabilitation Journal</i> 2019; 42(3): 257-67. | database search | D. No prevalence of preference for competitive employment reported |
| Delman J, Adams LB. Barriers to and facilitators of vocational development for Black young adults with serious mental illnesses. <i>Psychiatric Rehabilitation Journal</i> 2021: No Pagination Specified.                                              | database search | D. No prevalence of preference for competitive employment reported |
| Diamond H. Vocational decision making in a psychiatric outpatient program. <i>Occupational Therapy in Mental Health</i> 1999; 14(3): 67-80.                                                                                                            | database search | D. No prevalence of preference for competitive employment reported |
| Dixon L, Hoch JS, Clark R, et al. Cost-effectiveness of two vocational rehabilitation programs for persons with severe mental illness. <i>Psychiatric Services</i> 2002; 53(9): 1118-24.                                                               | database search | D. No prevalence of preference for competitive employment reported |
| Dorio J, Guitar A, Solheim L, Dvorkin C, Marine S. Differences in job retention in a supported employment program Chinook clubhouse. <i>Psychiatric Rehabilitation Journal</i> 2002; 25(3): 289-98.                                                    | database search | D. No prevalence of preference for competitive employment reported |
| Drummond A, Coole C, Nouri F, Ablewhite J, Smyth G. Using occupational therapists in vocational clinics in primary care: A feasibility study. <i>BMC Family Practice</i> 2020; 21(1): 1-10.                                                            | database search | D. No prevalence of preference for competitive employment reported |
| Duvdevany I, Rimmerman A. Individuals with work-related disabilities: Locus of control, attitudes toward work, and cooperation with the rehabilitation worker. <i>Journal of Applied Rehabilitation Counseling</i> 1996; 27(2): 30-5.                  | database search | D. No prevalence of preference for competitive employment reported |
| Ekberg K, Wahlin C, Persson J, Bernfort L, Oberg B. Is mobility in the labor market a solution to sustainable return to work for some sick listed persons? <i>Journal of Occupational Rehabilitation</i> 2011; 21(3): 355-65.                          | database search | D. No prevalence of preference for competitive employment reported |
| Eklund M, Backstrom M. Factor structure and construct validity of the Worker Role Self-Assessment (WRS) when used for people with psychiatric disabilities in Sweden. <i>Evaluation &amp; the Health Professions</i> 2016; 39(3): 299-316.             | database search | D. No prevalence of preference for competitive employment reported |
| Eklund M, Sandlund M. Predictors of valued everyday occupations, empowerment and satisfaction in day centres: Implications for services for persons with psychiatric disabilities. <i>Scandinavian Journal of Caring Sciences</i> 2014; 28(3): 582-90. | database search | D. No prevalence of preference for competitive employment reported |
| Emsley RA, Seedat S, Stein DJ. Posttraumatic stress disorder and occupational disability in South African Security Force members. <i>Journal of Nervous and Mental Disease</i> 2003; 191(4): 237-41.                                                   | database search | D. No prevalence of preference for competitive employment reported |
| Fineran S, Gruber JE. Youth at work: Adolescent employment and sexual harassment. <i>Child Abuse &amp; Neglect</i> 2009; 33(8): 550-9.                                                                                                                 | database search | D. No prevalence of preference for competitive employment reported |
| Fyhn T, Overland S, Reme SE. Predictors of employment in people with moderate to severe mental illness participating in a randomized controlled trial of Individual Placement and Support (IPS). <i>Int J Soc Psychiatry</i> . 2021;67(2):150-7.       | database search | D. No prevalence of preference for competitive employment reported |

|                                                                                                                                                                                                                                                                                                                                               |                 |                                                                    |
|-----------------------------------------------------------------------------------------------------------------------------------------------------------------------------------------------------------------------------------------------------------------------------------------------------------------------------------------------|-----------------|--------------------------------------------------------------------|
| Garachana Carpintero ML, Santamaría-Vázquez M. The relationship between volition and independent occupational performance in people with mental disorders. <i>Occupational Therapy in Mental Health</i> 2017; 33(4): 394-406.                                                                                                                 | database search | D. No prevalence of preference for competitive employment reported |
| Gregitis S, Glacken J, Julian C, Underwood K. Comparing working role values of employed and unemployed Clubhouse members. <i>Work: Journal of Prevention, Assessment &amp; Rehabilitation</i> 2010; 36(1): 39-46.                                                                                                                             | database search | D. No prevalence of preference for competitive employment reported |
| Gutierrez-Garcia RA, Benjet C, Borges G, Mendez Rios E, Medina-Mora ME. Emerging adults not in education, employment or training (NEET): Socio-demographic characteristics, mental health and reasons for being NEET. <i>BMC Public Health</i> 2018; 18(1): 1201.                                                                             | database search | D. No prevalence of preference for competitive employment reported |
| Hanna R, Fiedler RC, Dietrich H, Creitemann B, Heuft G. Goal analysis and goal operationalisation: A group intervention for the enhancement of work motivation. <i>PPmP: Psychotherapie Psychosomatik Medizinische Psychologie</i> 2010; 60(8): 316-25.                                                                                       | database search | D. No prevalence of preference for competitive employment reported |
| Hedlund A, Kristofferzon ML, Boman E, Nilsson A. Are return to work beliefs, psychological well-being and perceived health related to return-to-work intentions among women on long-term sick leave for common mental disorders? A cross-sectional study based on the theory of planned behaviour. <i>BMC Public Health</i> 2021; 21(1): 535. | database search | D. No prevalence of preference for competitive employment reported |
| Hedlund A, Nilsson A, Boman E, Kristofferzon M-L. Predictors of return to work and psychological well-being among women during/after long-term sick leave due to common mental disorders - a prospective cohort study based on the theory of planned behaviour. <i>Health &amp; Social Care in the Community</i> . 2022:No-Specified.         | database search | D. No prevalence of preference for competitive employment reported |
| Hillborg H, Svensson T, Danermark B. Towards a working life? Experiences in a rehabilitation process for people with psychiatric disabilities. <i>Scand J Occup Ther</i> 2010; 17(2): 149-61.                                                                                                                                                 | database search | D. No prevalence of preference for competitive employment reported |
| Hönig A. [Job placement for people with severe mental illness. The group experience and employment support in a community mental health institution in Buenos Aires]. <i>Vertex</i> 2015; 26(124): 435-40.                                                                                                                                    | database search | D. No prevalence of preference for competitive employment reported |
| Horn L, Spronken M, Brouwers EPM, de Reuver RSM, Joosen MCW. Identifying return to work self-efficacy trajectories in employees with mental health problems. <i>J Occup Rehabil</i> . 2022;32(1):64-76.                                                                                                                                       | database search | D. No prevalence of preference for competitive employment reported |
| Jensen AGC. Towards a parsimonious program theory of return to work intervention. <i>Work: Journal of Prevention, Assessment &amp; Rehabilitation</i> 2013; 44(2): 155-64.                                                                                                                                                                    | database search | D. No prevalence of preference for competitive employment reported |
| Kang S-Y, Magura S, Blankertz L, Madison E, Spinelli M. Predictors of engagement in vocational counseling for methadone treatment patients. <i>Substance Use &amp; Misuse</i> 2006; 41(8): 1125-38.                                                                                                                                           | database search | D. No prevalence of preference for competitive employment reported |
| Kilian R, Muller-Stierlin A, Sohner F, et al. Masculinity norms and occupational role orientations in men treated for depression. <i>PLoS ONE</i> 2020; 15(5): e0233764.                                                                                                                                                                      | database search | D. No prevalence of preference for competitive employment reported |
| Kin Wong K, Chiu R, Tang B, Mak D, Liu J, Chiu SN. A randomized controlled trial of a supported employment program for persons with long-term mental illness in Hong Kong. <i>Psychiatric Services</i> 2008; 59(1): 84-90.                                                                                                                    | database search | D. No prevalence of preference for competitive employment reported |

|                                                                                                                                                                                                                                                                                   |                 |                                                                    |
|-----------------------------------------------------------------------------------------------------------------------------------------------------------------------------------------------------------------------------------------------------------------------------------|-----------------|--------------------------------------------------------------------|
| Kirsh B. Organizational culture, climate and person-environment fit: Relationships with employment outcomes for mental health consumers. <i>Work: Journal of Prevention, Assessment &amp; Rehabilitation</i> 2000; 14(2): 109-22.                                                 | database search | D. No prevalence of preference for competitive employment reported |
| Kirsh B. Work, workers, and workplaces: a qualitative analysis of narratives of mental health consumers. <i>Journal of Rehabilitation</i> 2000; 66(4): 24-30.                                                                                                                     | database search | D. No prevalence of preference for competitive employment reported |
| Krieschok TS, Hastings S, Ebberwein C, Wettersten K, Owen A. Telling a good story: Using narratives in vocational rehabilitation with veterans. <i>The Career Development Quarterly</i> 1999; 47(3): 204-14.                                                                      | database search | D. No prevalence of preference for competitive employment reported |
| Kukla M, Strasburger AM, Salyers MP, Rollins AL, Lysaker PH. Psychosocial outcomes of a pilot study of work-tailored cognitive behavioral therapy intervention for adults with serious mental illness. <i>Journal of Clinical Psychology</i> . 2021;77(3):488-95.                 | database search | D. No prevalence of preference for competitive employment reported |
| Lancic F, Majski-Cesarec S, Musil V. [School choice and vocational guidance for schoolchildren with chronic diseases and other health problems]. <i>Arh Hig Rada Toksikol</i> 2010; 61(3): 323-32.                                                                                | database search | D. No prevalence of preference for competitive employment reported |
| Langle G, Koster M, Mayenberger M, Gunthner A. [Trial employment: A provisional work setting for psychiatric patients]. <i>Psychiatrische Praxis</i> 2000; 27(4): 176-82.                                                                                                         | database search | D. No prevalence of preference for competitive employment reported |
| Larson JE, Barr LK, Kuwabara SA, Boyle MG, Glenn TL. Process and outcome analysis of a supported employment program for people with psychiatric disabilities. <i>American Journal of Psychiatric Rehabilitation</i> 2007; 10(4): 339-53.                                          | database search | D. No prevalence of preference for competitive employment reported |
| Latimer EA, Lecomte T, Becker DR, et al. Generalisability of the individual placement and support model of supported employment: Results of a Canadian randomised controlled trial. <i>The British Journal of Psychiatry</i> 2006; 189(1): 65-73.                                 | database search | D. No prevalence of preference for competitive employment reported |
| Lau B, Shiryayeva O, Ruud T, Victor M. What are they returning to? Psychosocial work environment as a predictor of returning to work among employees in treatment for common mental disorders: A prospective observational pre-post study. <i>PLoS ONE</i> 2019; 14(4): e0215354. | database search | D. No prevalence of preference for competitive employment reported |
| Mares AS, Rosenheck RA. Attitudes towards employment and employment outcomes among homeless veterans with substance abuse and/or psychiatric problems. <i>American Journal of Psychiatric Rehabilitation</i> 2006; 9(3): 145-66.                                                  | database search | D. No prevalence of preference for competitive employment reported |
| McCrohan NM, Mowbray CT, Bybee D, Harris SN. Employment histories and expectations of persons with psychiatric disorders. <i>Rehabilitation Counseling Bulletin</i> 1994; 38(1): 59-71.                                                                                           | database search | D. No prevalence of preference for competitive employment reported |
| McCrum BW, Burnside LK, Duffy TL. Organising for work: A job clinic for people with mental health needs. <i>Journal of Mental Health</i> 1997; 6(5): 503-13.                                                                                                                      | database search | D. No prevalence of preference for competitive employment reported |
| McGilloway S, Donnelly M. Work, rehabilitation and mental health. <i>Journal of Mental Health</i> 2000; 9(2): 199-210.                                                                                                                                                            | database search | D. No prevalence of preference for competitive employment reported |
| McQueen JM, Turner J. Exploring forensic mental health service users' views on work: An interpretative phenomenological analysis. <i>The British Journal of Forensic Practice</i> 2012; 14(3): 168-79.                                                                            | database search | D. No prevalence of preference for competitive employment reported |

|                                                                                                                                                                                                                                                                    |                 |                                                                    |
|--------------------------------------------------------------------------------------------------------------------------------------------------------------------------------------------------------------------------------------------------------------------|-----------------|--------------------------------------------------------------------|
| Mervis JE, Lysaker PH, Fiszdon JM, et al. Addressing defeatist beliefs in work rehabilitation. <i>Journal of Mental Health</i> 2016; 25(4): 366-71.                                                                                                                | database search | D. No prevalence of preference for competitive employment reported |
| Merz MA, Szymanski EM. Effects of a vocational rehabilitation-based career workshop on commitment to career choice. <i>Rehabilitation Counseling Bulletin</i> 1997; 41(2): 88-104.                                                                                 | database search | D. No prevalence of preference for competitive employment reported |
| Meschnig A, von Kardorff E, Klaus S. [Return to work from vocational retraining. A long-term analysis of individual trajectories: biographical and structural conditions of success and failure]. <i>Rehabilitation (Stuttg)</i> 2019; 58(3): 153-62.              | database search | D. No prevalence of preference for competitive employment reported |
| Meshberg-Cohen S, Reid-Quinones K, Black AC, Rosen MI. Veterans' attitudes toward work and disability compensation: Associations with substance abuse. <i>Addictive Behaviors</i> 2014; 39(2): 445-8.                                                              | database search | D. No prevalence of preference for competitive employment reported |
| Millward L, Lutte A, Purvis R. Depression and the perpetuation of an incapacitated identity as an inhibitor of return to work. <i>Journal of Psychiatric and Mental Health Nursing</i> 2005; 12(5): 565-73.                                                        | database search | D. No prevalence of preference for competitive employment reported |
| Mowbray CT, Bybee D, Harris SN, McCrohan N. Predictors of work status and future work orientation in people with a psychiatric disability. <i>Psychiatric Rehabilitation Journal</i> 1995; 19(2): 17.                                                              | database search | D. No prevalence of preference for competitive employment reported |
| Mueser KT, Becker DR, Wolfe R. Supported employment, job preferences, job tenure and satisfaction. <i>Journal of Mental Health</i> 2001; 10(4): 411-7.                                                                                                             | database search | D. No prevalence of preference for competitive employment reported |
| O'Day B, Killeen M, Goldberg S. Not just any job: People with psychiatric disabilities build careers. <i>Journal of Vocational Rehabilitation</i> 2006; 25(2): 119-31.                                                                                             | database search | D. No prevalence of preference for competitive employment reported |
| Pernice R. Employment attitudes and mental health of long-term unemployed people with disabilities: Implications for rehabilitation counselors. <i>Journal of Applied Rehabilitation Counseling</i> 1997; 28(2): 21-5.                                             | database search | D. No prevalence of preference for competitive employment reported |
| Reker T, Eikermann B. [Predictors of success in supported employment programmes--results of a prospective study]. <i>Psychiatrische Praxis</i> 1999; 26(5): 218-23.                                                                                                | database search | D. No prevalence of preference for competitive employment reported |
| Resnick SG, Neale MS, Rosenheck RA. Impact of public support payments, intensive psychiatric community care, and program fidelity on employment outcomes for people with severe mental illness. <i>Journal of Nervous and Mental Disease</i> 2003; 191(3): 139-44. | database search | D. No prevalence of preference for competitive employment reported |
| Roberts MM, Pratt CW. A construct validity study of employment readiness in persons with severe mental illness. <i>American Journal of Psychiatric Rehabilitation</i> 2010; 13(1): 40-54.                                                                          | database search | D. No prevalence of preference for competitive employment reported |
| Schindler VP. A client-centred, occupation-based occupational therapy programme for adults with psychiatric diagnoses. <i>Occupational Therapy International</i> 2010; 17(3): 105-12.                                                                              | database search | D. No prevalence of preference for competitive employment reported |
| Secker J, Membrey H. Promoting mental health through employment and developing healthy workplaces: The potential of natural supports at work. <i>Health Education Research</i> 2003; 18(2): 207-15.                                                                | database search | D. No prevalence of preference for competitive employment reported |
| Sripada RK, Henry J, Yosef M, et al. Occupational functioning and employment services use among VA primary care patients                                                                                                                                           | database search | D. No prevalence of preference for competitive employment reported |

|                                                                                                                                                                                                                                                                                                |                 |                                                                    |
|------------------------------------------------------------------------------------------------------------------------------------------------------------------------------------------------------------------------------------------------------------------------------------------------|-----------------|--------------------------------------------------------------------|
| with posttraumatic stress disorder. <i>Psychological Trauma: Theory, Research, Practice &amp; Policy</i> 2018; 10(2): 140-3.                                                                                                                                                                   |                 |                                                                    |
| Suzuki Y, Kikuchi E, Watanabe S. Assessment of vocational opportunities and continuing job placement for persons with mental disabilities: Factors indicating levels of necessary support. <i>Work: Journal of Prevention, Assessment &amp; Rehabilitation</i> 2008; 30(2): 185-94.            | database search | D. No prevalence of preference for competitive employment reported |
| Tan P, Hawkins WE, Thomas L. Job satisfaction and intent to continue working among individuals with serious mental illness. <i>Psychological Reports</i> 1999; 85(3): 801-7.                                                                                                                   | database search | D. No prevalence of preference for competitive employment reported |
| Taskila T, Steadman K, Gulliford J, Thomas R, Elston R, Bevan S. Working with schizophrenia: Experts' views on barriers and pathways to employment and job retention. <i>Journal of Vocational Rehabilitation</i> 2014; 41(1): 29-44.                                                          | database search | D. No prevalence of preference for competitive employment reported |
| Turner N, Ferguson L, Hill M, et al. Perspectives on paid work among men and women with schizophrenia: The results of a two study comparison in Ireland. <i>Work</i> 2020; 67(2): 507-15.                                                                                                      | database search | D. No prevalence of preference for competitive employment reported |
| Turner N, Lydon C. Psychosocial programming in Ireland based on the Model of Human Occupation: a program evaluation study. <i>Occupational Therapy in Health Care</i> 2008; 22(2/3): 105-14.                                                                                                   | database search | D. No prevalence of preference for competitive employment reported |
| Van Dongen CJ. Quality of life and self-esteem in working and nonworking persons with mental illness. <i>Community Mental Health Journal</i> 1996; 32(6): 535-48.                                                                                                                              | database search | D. No prevalence of preference for competitive employment reported |
| van Hoffen MF, Joling CI, Heymans MW, Twisk JW, Roelen CA. Mental health symptoms identify workers at risk of long-term sickness absence due to mental disorders: Prospective cohort study with 2-year follow-up. <i>BMC Public Health</i> 2015; 15: 1235.                                     | database search | D. No prevalence of preference for competitive employment reported |
| Waghorn G, Saha S, McGrath JJ. Correlates of competitive versus noncompetitive employment among adults with psychotic disorders. <i>Psychiatric Services</i> 2014; 65(4): 476-82.                                                                                                              | database search | D. No prevalence of preference for competitive employment reported |
| Werbart A, Bergstedt A, Levander S. Love, work, and striving for the self in balance: Anaclitic and introjective patients' experiences of change in psychoanalysis. <i>Frontiers in Psychology</i> 2020; 11: 144.                                                                              | database search | D. No prevalence of preference for competitive employment reported |
| Wormgoor M, Indahl A, Andersen E, Egeland J. Effectiveness of briefer coping-focused psychotherapy for common mental complaints on work-participation and mental health: A pragmatic randomized trial with 2-year follow-up. <i>Journal of Occupational Rehabilitation</i> 2020; 30(1): 22-39. | database search | D. No prevalence of preference for competitive employment reported |
| Wu Y-J, Su W-L, Lin Y-H, Chueh C-M, Su C-Y. A comparison of perceptions among employed and unemployed individuals with psychiatric disabilities regarding factors affecting employment. <i>OTJR: Occupation, Participation and Health</i> 2009; 29(3): 105-15.                                 | database search | D. No prevalence of preference for competitive employment reported |
| Zschucke E, Hessel A, Lippke S. [Temporary Disability Pension from the Perspective of the Individual: Self-Reported Physical and Mental Health, Medical Rehabilitation, and Return to Work Plans]. <i>Rehabilitation (Stuttg)</i> 2016; 55(4): 223-9.                                          | database search | D. No prevalence of preference for competitive employment reported |
| Carlson L, Rapp CA. Consumer preference and individualized job search. <i>American Journal of Psychiatric Rehabilitation</i> 2007; 10(2): 123-30.                                                                                                                                              | Google Scholar  | D. No prevalence of preference for competitive employment reported |

Adamus, Richter, Sutor, Zürcher, & Mötteli. Preference for competitive employment in people with mental disorders – A systematic review and meta-analysis of proportions.

|                                                                                                                                                                                                                                                |                |                                                                    |
|------------------------------------------------------------------------------------------------------------------------------------------------------------------------------------------------------------------------------------------------|----------------|--------------------------------------------------------------------|
| de Waal A, Dixon LB, Humensky JL. Association of participant preferences on work and school participation after a first episode of psychosis. <i>Early Intervention in Psychiatry</i> 2017; 12(1-5): 959-63.                                   | Google Scholar | D. No prevalence of preference for competitive employment reported |
| Rice CD, Howard L, Leese M, Jarrett M, Thornicroft G. Determinants of wanting to seek full versus part-time paid employment among people with severe mental illness. <i>Journal of Mental Health</i> 2009; 18(5): 424-32.                      | Google Scholar | D. No prevalence of preference for competitive employment reported |
| Alverson H, Carpenter E, Drake RE. An ethnographic study of job seeking among people with severe mental illness. <i>Psychiatric Rehabilitation Journal</i> 2006; 30(1): 15-22.                                                                 | reference list | D. No prevalence of preference for competitive employment reported |
| Anthony WA, Rogers ES, Cohen M, Davies RR. Relationships between psychiatric symptomatology, work skills, and future vocational performance. <i>Psychiatric Services</i> 1995; 46(4): 353-8.                                                   | reference list | D. No prevalence of preference for competitive employment reported |
| Burns T, Catty J, White S, et al. The impact of supported employment and working on clinical and social functioning: results of an international study of individual placement and support. <i>Schizophrenia Bulletin</i> 2009; 35(5): 949-58. | reference list | D. No prevalence of preference for competitive employment reported |
| Campbell K, Bond GR, Drake RE. Who benefits from supported employment: a meta-analytic study. <i>Schizophrenia Bulletin</i> 2011; 37(2): 370-80.                                                                                               | reference list | D. No prevalence of preference for competitive employment reported |
| Choi K-H, Fiszdon JM, Bell MD. Beyond cognition: a longitudinal investigation of the role of motivation during a vocational rehabilitation program. <i>The Journal of Nervous and Mental Disease</i> 2013; 201(3): 173-8.                      | reference list | D. No prevalence of preference for competitive employment reported |
| Curtin RB, Oberley ET, Sacksteder P, Friedman A. Differences between employed and nonemployed dialysis patients. <i>American Journal of Kidney Diseases</i> 1996; 27(4): 533-40.                                                               | reference list | D. No prevalence of preference for competitive employment reported |
| Grove B. Mental health and employment: shaping a new agenda. <i>Journal of Mental Health</i> 1999; 8(2): 131-40.                                                                                                                               | reference list | D. No prevalence of preference for competitive employment reported |
| Honkonen T, Stengård E, Virtanen M, Salokangas RKR. Employment predictors for discharged schizophrenia patients. <i>Social Psychiatry and Psychiatric Epidemiology</i> 2007; 42: 372-80.                                                       | reference list | D. No prevalence of preference for competitive employment reported |
| LaPlante MP, Kennedy J, Kaye HS, Wenger BL. Disability and employment. disability statistics abstract number 11. National Institute on Disability and Rehabilitation Research 1996.                                                            | reference list | D. No prevalence of preference for competitive employment reported |
| McManus S, Bebbington PE, Jenkins R, Brugha T. Mental health and wellbeing in England: the adult psychiatric morbidity survey 2014: NHS digital; 2016.                                                                                         | reference list | D. No prevalence of preference for competitive employment reported |
| Mueser KT, Clark RE, Haines M, et al. The hartford study of supported employment for persons with severe mental illness: employment and non-vocational outcomes. <i>Journal of Consulting and Clinical Psychology</i> 2004; 72(3): 479-90.     | reference list | D. No prevalence of preference for competitive employment reported |
| Provencher HL, Gregg R, Mead S, Mueser KT. The role of work in the recovery of persons with psychiatric disabilities. <i>Psychiatric Rehabilitation Journal</i> 2002; 26(2): 132-44.                                                           | reference list | D. No prevalence of preference for competitive employment reported |
| Reid AM, Lang CM, O'Neill T. Services for schizophrenic patients and their families: what they say they need. <i>Behavioural and Cognitive Psychotherapy</i> 1993; 21(2): 107-13.                                                              | reference list | D. No prevalence of preference for competitive employment reported |
| Rogers ES, Anthony WA, Toole J, Brown MA. Vocational outcomes following psychosocial rehabilitation: a longitudinal                                                                                                                            | reference list | D. No prevalence of preference for competitive employment reported |



|                                                                                                                                                                                                                                                                                                           |                 |                                                                    |
|-----------------------------------------------------------------------------------------------------------------------------------------------------------------------------------------------------------------------------------------------------------------------------------------------------------|-----------------|--------------------------------------------------------------------|
| study of three programs. <i>Journal of Vocational Rehabilitation</i> 1991; 1(3): 21-9.                                                                                                                                                                                                                    |                 |                                                                    |
| Saperstein AM, Fiszdon JM, Bell MD. Intrinsic motivation as a predictor of work outcome after vocational rehabilitation in schizophrenia. <i>The Journal of Nervous and Mental Disease</i> 2011; 199(9): 672-7.                                                                                           | reference list  | D. No prevalence of preference for competitive employment reported |
| Waghorn G, Chant D, White P, Whiteford H. Delineating disability, labour force participation and employment restrictions among persons with psychosis. <i>Acta Psychiatrica Scandinavica</i> 2004; 109(4): 279-88.                                                                                        | reference list  | D. No prevalence of preference for competitive employment reported |
| Waghorn G, Chant D, Whiteford H. Clinical and non-clinical predictors of vocational recovery for Australians with psychotic disorders. <i>Journal of Rehabilitation</i> 2002; 68(4): 40-51.                                                                                                               | reference list  | D. No prevalence of preference for competitive employment reported |
| Waghorn G, Chant D, Whiteford H. The strength of self-reported course of illness in predicting vocational recovery for persons with schizophrenia. <i>Journal of Vocational Rehabilitation</i> 2003; 18(1): 33-41.                                                                                        | reference list  | D. No prevalence of preference for competitive employment reported |
| Waghorn G, Saha S, Harvey C, et al. 'Earning and learning' in those with psychotic disorders: the second Australian national survey of psychosis. <i>Australian &amp; New Zealand Journal of Psychiatry</i> 2012; 46(8): 774-85.                                                                          | reference list  | D. No prevalence of preference for competitive employment reported |
| Waghorn GR, Chant DC. Employment restrictions among persons with ICD-10 anxiety disorders: characteristics from a population survey. <i>Journal of Anxiety Disorders</i> 2005; 19(6): 642-57.                                                                                                             | reference list  | D. No prevalence of preference for competitive employment reported |
| Watkins KE, Pincus HA, Paddock S, et al. Care for veterans with mental and substance use disorders: good performance, but room to improve on many measures. <i>Health Affairs</i> 2011; 30(11): 2194-203.                                                                                                 | reference list  | D. No prevalence of preference for competitive employment reported |
| Zivin K, Bohnert AS, Mezuk B, Ilgen MA, Welsh D, Ratliff S, et al. Employment status of patients in the VA health system: implications for mental health services. <i>Psychiatr Serv.</i> 2011;62(1):35-8.                                                                                                | reference list  | D. No prevalence of preference for competitive employment reported |
| Benz MR, McAllister M. Occupational and leisure preferences of older adults with mental retardation. <i>Australia &amp; New Zealand Journal of Developmental Disabilities</i> 1990; 16(3): 233-44.                                                                                                        | database search | E. No (sub-)sample with MD                                         |
| Creed P. Mental health, attitude-to-work and life situation outcomes for long-term unemployed attending occupational skills training. <i>Journal of Applied Social Behaviour</i> 1997; 4(1): 52-68.                                                                                                       | database search | E. No (sub-)sample with MD                                         |
| Diminic S, Hielscher E, Harris MG. Caring hours and possible need for employment support among primary carers for adults with mental illness: Results from an Australian household survey. <i>Health &amp; Social Care in the Community</i> 2019; 27(5): e837-e49.                                        | database search | E. No (sub-)sample with MD                                         |
| Hounshell J, Tomori C, Newlin R, et al. Changes in finances, insurance, employment, and lifestyle among persons diagnosed with hairy cell leukemia. <i>Oncologist</i> 2001; 6(5): 435-40.                                                                                                                 | database search | E. No (sub-)sample with MD                                         |
| Kessemeier F, Petermann F, Stockler C, Bassler M, Pfeiffer W, Kobelt A. Using mental contrasting with implementation intentions to promote work-related goals in psychosomatic rehabilitation. <i>Zeitschrift für Klinische Psychologie und Psychotherapie: Forschung und Praxis</i> 2018; 47(2): 89-100. | database search | E. No (sub-)sample with MD                                         |

Adamus, Richter, Sutor, Zürcher, & Mötteli. Preference for competitive employment in people with mental disorders – A systematic review and meta-analysis of proportions.

|                                                                                                                                                                                                                                             |                 |                                               |
|---------------------------------------------------------------------------------------------------------------------------------------------------------------------------------------------------------------------------------------------|-----------------|-----------------------------------------------|
| Kilsby MS, Beyer S. Enhancing self-determination in job matching in supported employment for people with learning disabilities: An intervention study. <i>Journal of Vocational Rehabilitation</i> 2002; 17(2): 125-35.                     | database search | E. No (sub-)sample with MD                    |
| Milleur Y, Desveaux J-B. Getting back to work. <i>Topique: La Psychanalyse Aujourd'hui</i> 2020; 148: 63-77.                                                                                                                                | database search | E. No (sub-)sample with MD                    |
| Suijkerbuijk Y, Nieuwenhuijsen K. Identification of the return-to-work mode in unemployed workers with mental health issues: A focus group study among occupational health professionals. <i>Work (Reading, Mass)</i> . 2023;74(3):891-906. | database search | E. No (sub-)sample with MD                    |
| Szivos SE. Attitudes to work and their relationship to self esteem and aspirations among young adults with a mild mental handicap. <i>British Journal of Mental Subnormality</i> 1990; 36(71): 108-17.                                      | database search | E. No (sub-)sample with MD                    |
| Taylor LC. Work attitudes, employment barriers, and mental health symptoms in a sample of rural welfare recipients. <i>American Journal of Community Psychology</i> 2001; 29(3): 443-63.                                                    | database search | E. No (sub-)sample with MD                    |
| Wehmeyer ML, Bolding N. Self-determination across living and working environments: A matched-samples study of adults with mental retardation. <i>Mental Retardation</i> 1999; 37(5): 353-63.                                                | database search | E. No (sub-)sample with MD                    |
| West MD, Targett P, Steininger G, Anglin N. Project Corporate Support (CORPS): A model demonstration project on workplace supports. <i>Journal of Vocational Rehabilitation</i> 2001; 16(2): 111-8.                                         | database search | E. No (sub-)sample with MD                    |
| Worsdell AS, Iwata BA, Wallace MD. Duration-based measures of preference for vocational tasks. <i>Journal of Applied Behavior Analysis</i> 2002; 35(3): 287-90.                                                                             | database search | E. No (sub-)sample with MD                    |
| Pernice R, Long N. Long-term unemployment, employment attitudes and mental health. <i>Australian Journal of Social Issues</i> 1996; 31(3): 311-26.                                                                                          | Google Scholar  | E. No (sub-)sample with MD                    |
| Catty J, Lissouba P, White S, et al. Predictors of employment for people with severe mental illness: results of an international six-centre randomised controlled trial. <i>The British Journal of Psychiatry</i> 2008; 192(3): 224-31.     | reference list  | E. No (sub-)sample with MD                    |
| Khare C, McGurk SR, Fulford D, et al. A longitudinal analysis of employment in people with severe mental illnesses in India. <i>Schizophr Res</i> 2021; 228: 472-80.                                                                        | database search | F. Duplicate publication of an included study |
| Poremski D, Hwang SW. Willingness of Housing First participants to consider supported-employment services. <i>Psychiatric Services</i> 2016; 67(6): 667-70.                                                                                 | database search | F. Duplicate publication of an included study |
| Reker T, Eikermann B. [The course of illness and rehabilitation of schizophrenic patients in ambulatory vocational therapy. A prospective study over 3 years]. <i>Nervenarzt</i> 1998; 69(3): 210-8.                                        | database search | F. Duplicate publication of an included study |
| Reker T, Eikermann B. Work therapy for schizophrenic patients: Results of a 3-year prospective study in Germany. <i>Eur Arch Psychiatry Clin Neurosci</i> 1997; 247(6): 314-9.                                                              | database search | F. Duplicate publication of an included study |
| Reker T, Hornung WP, Schonauer K, Eikermann B. Long-term psychiatric patients in vocational rehabilitation programmes: A naturalistic follow-up study over 3 years. <i>Acta Psychiatrica Scandinavica</i> 2000; 101(6): 457-63.             | database search | F. Duplicate publication of an included study |
| Wan Kasim SH, Midin M, Abu Bakar AK, Sidi H, Jaafar NRN, Das S. Employment program for patients with severe mental illness in Malaysia: A 3-month outcome. <i>Comprehensive Psychiatry</i> 2014; 55(1): S38-S45.                            | database search | F. Duplicate publication of an included study |

Adamus, Richter, Sutor, Zürcher, & Mötteli. Preference for competitive employment in people with mental disorders – A systematic review and meta-analysis of proportions.
